# Supplementary material for: Polymerization of an activated ester monomer based on 4-vinylsulfonic acid and its polymer analogous reaction
Source: Royal Society of Chemistry journal article supplement (doi:10.1039/c0py00261e), 2010-10-15

# **Polymerization of an activated ester monomer based on 4-vinylsulfonic acid and its polymer analogous reaction**

**Katja Nilles and Patrick Theato\***

**Electronic Supplementary Information**

Figure S1. GPC curve for polyPFPVS (black line) and after conversion with pyrrolidine (PA7) (red line)

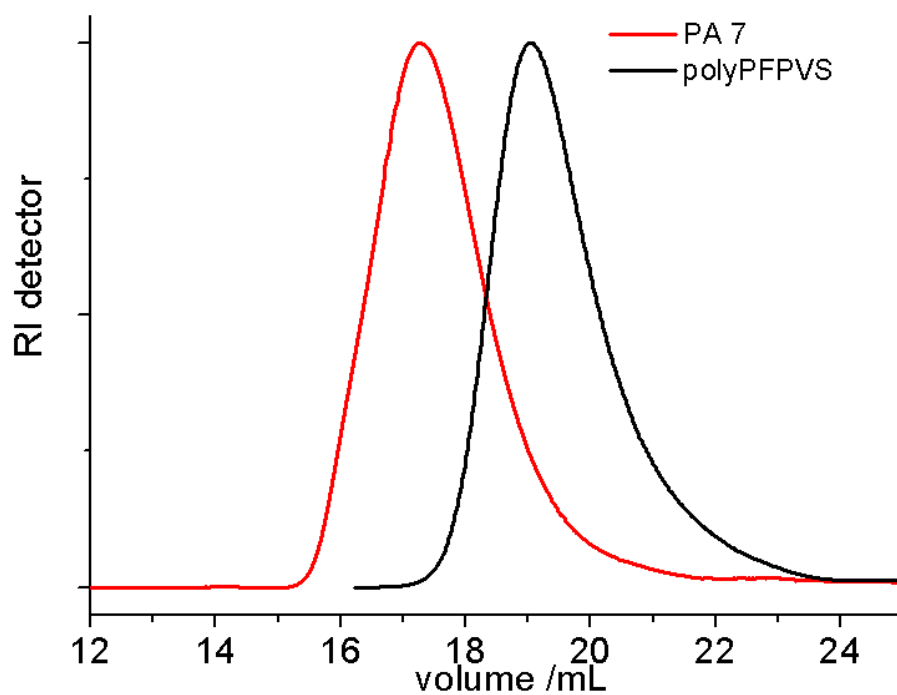

Figure S2.  $^{19}\text{F}$  NMR kinetic studies of the active ester with  $\text{N,N}$ -dimethylethylenediamine a) conversion of polyPFPVS b) conversion of polyPFPVB including the signals of the free PFPOH species.

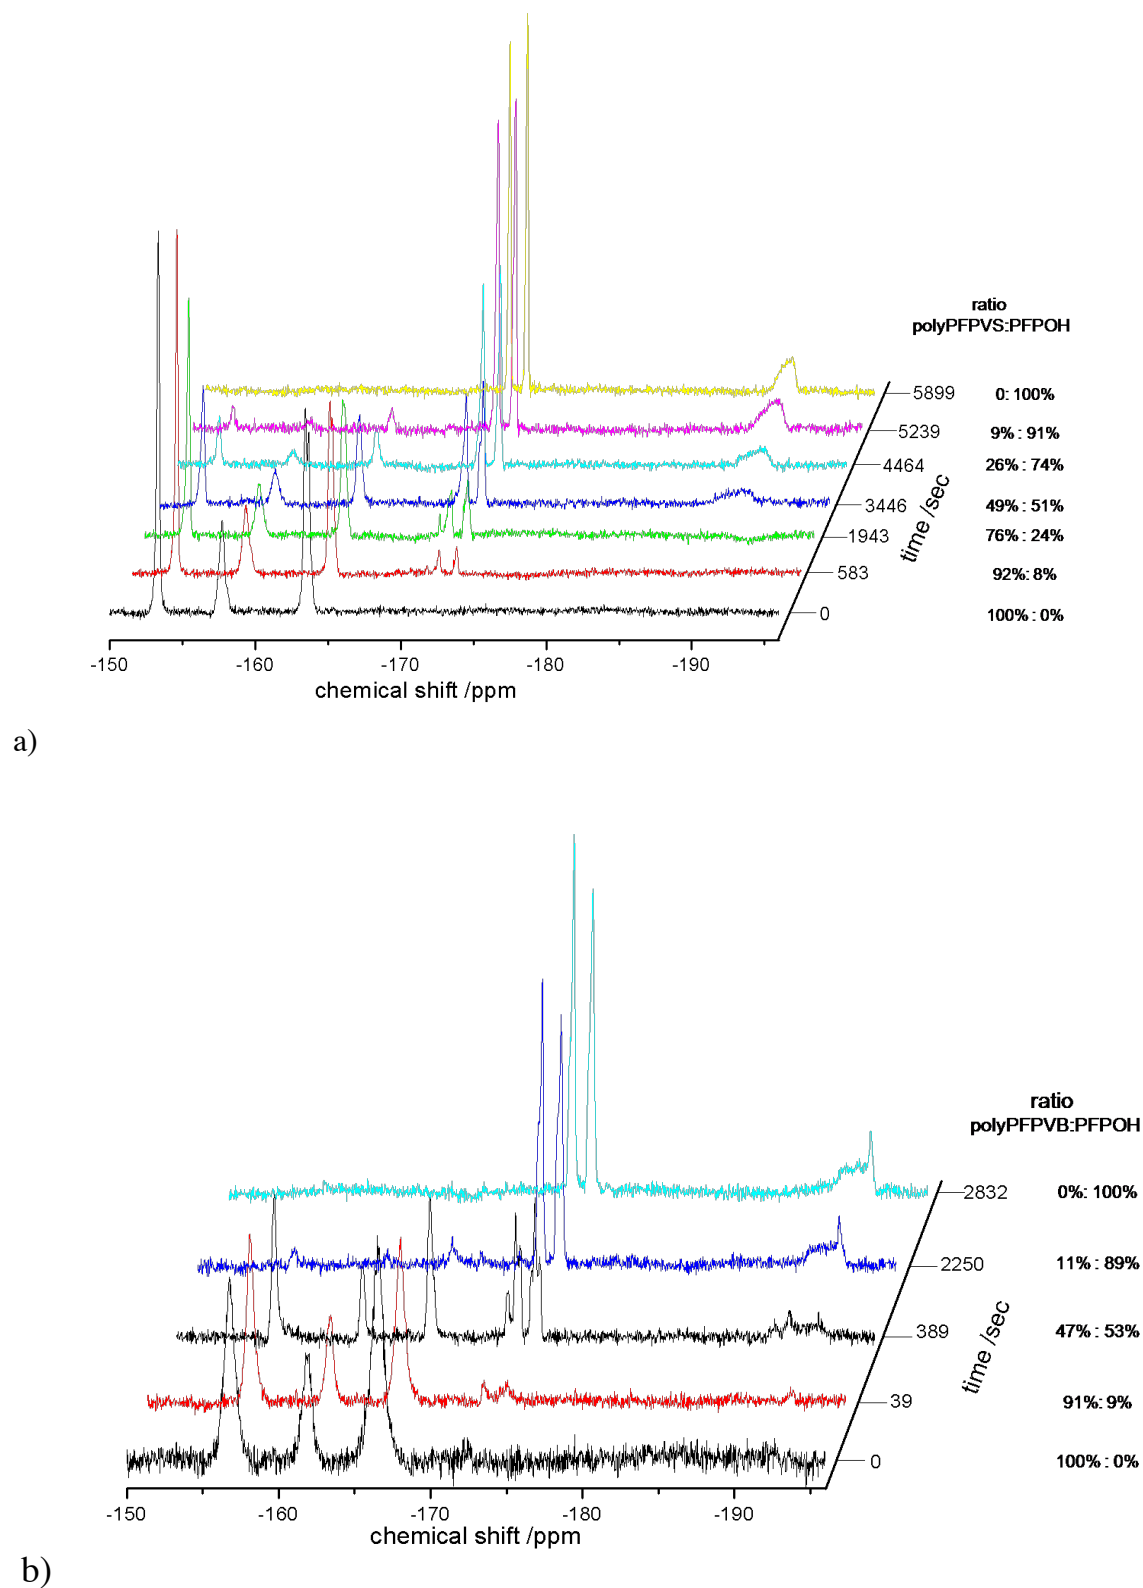

Supplement: c0py00261e.pdf [file c0py00261e.pdf]
